# Supplementary material for: Rational Design and Characterization of Symmetry-Breaking Organic Semiconductors in Polymer Solar Cells: A Theory Insight of the Asymmetric Advantage
Source: Materials (Basel). 2021 Nov 8;14(21):6723. doi: 10.3390/ma14216723 (PMC8587437; doi:10.3390/ma14216723)
Supplement: Supplementary file 1 [file materials-14-06723-s001.zip › materials-1439148-supplementary.pdf]

# Rational Design and Characterization of Symmetry-Breaking Organic Semiconductors in Polymer Solar Cells: A Theory Insight of the Asymmetric Advantage

Ze Zhou Liang <sup>1</sup>, Lihe Yan <sup>1,\*</sup>, Jinhai Si <sup>1</sup>, Pingping Gong <sup>1,2</sup>, Xiaoming Li <sup>3</sup>, Deyu Liu <sup>4</sup>, Jianfeng Li <sup>2</sup> and Xun Hou <sup>1</sup>

<sup>1</sup> Key Laboratory of Physical Electronics and Devices of the Ministry of Education & Shaanxi Key Lab of Photonic Technique for Information, School of Electronic Science and Engineering, Faculty of Electronic and Information Engineering, Xi'an Jiaotong University, Xi'an 710049, China; zezhouliang@foxmail.com (Z.L.); jinhaisi@mail.xjtu.edu.cn (J.S.); gpbxnl@163.com (P.G.); houxun@mail.xjtu.edu.cn (X.H.)

<sup>2</sup> School of Materials Science and Engineering, Lanzhou Jiaotong University, Lanzhou 730070, China; ljfpyc@163.com

<sup>3</sup> School of Chemistry, Beihang University, Beijing 100191, China; lixiaoming617@hotmail.com

<sup>4</sup> Department of Materials Science and Engineering, Ocean University of China, Qingdao 266100, China; lunlunyu@126.com

\* Correspondence: liheyang@mail.xjtu.edu.cn; Tel.: +86-029-82665670

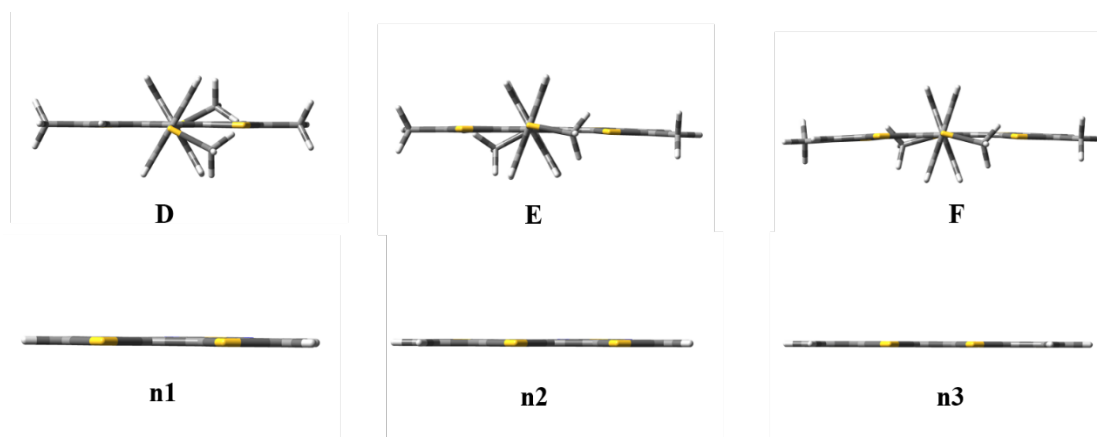

**Figure S1.** The side view of the monomers optimized geometry at ground state.

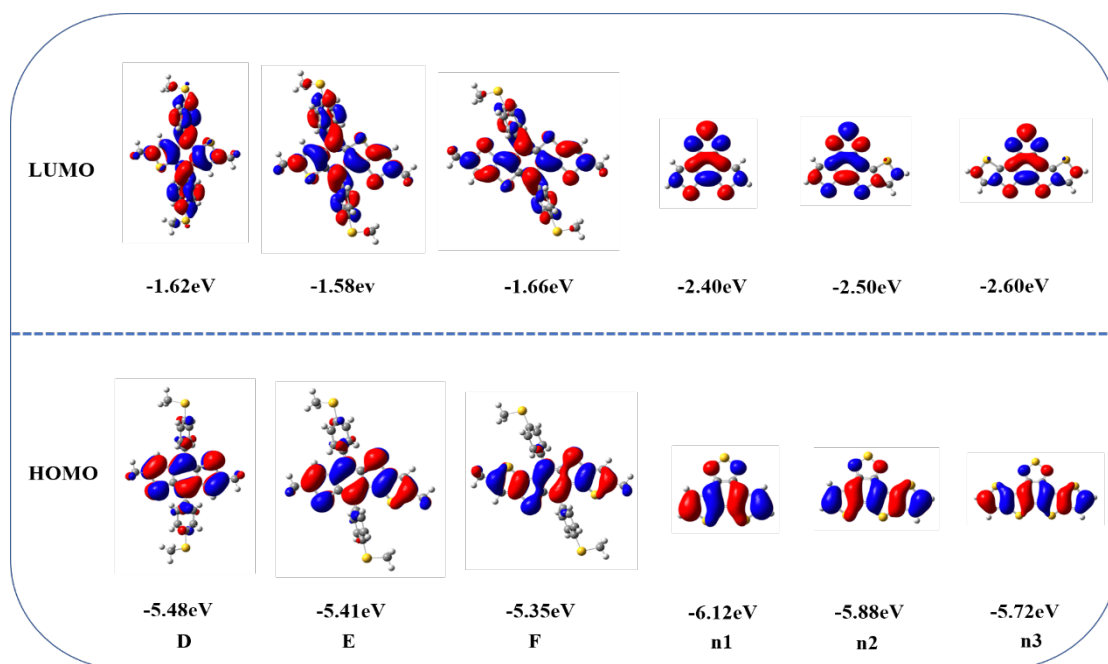

**Figure S2.** The HOMO and LUMO orbital electron cloud distribution of the monomers.

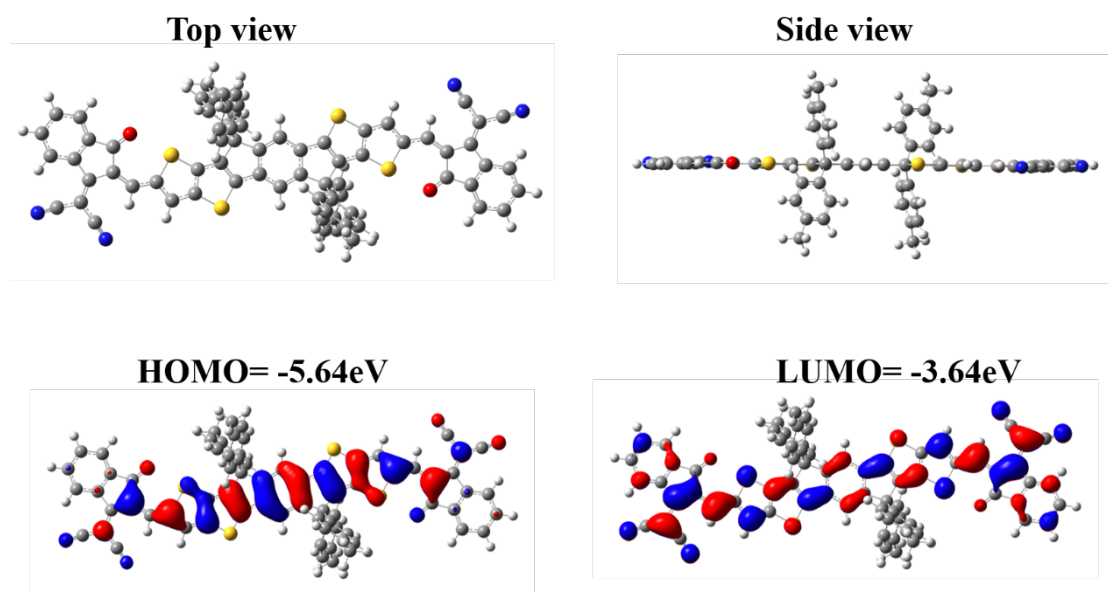

**Figure S3.** The optimized geometry at ground state and HOMO and LUMO orbital electron cloud distribution of the ITIC.
